# Supplementary material for: Causal effects of dietary antioxidant vitamin intake and oxidative stress on the risk of pre-eclampsia and gestational hypertension: a mendelian randomization study.
Source: Research Square preprint supplement (doi:10.21203/rs.3.rs-5219689/v1), 2024-11-02
Supplement: Supplementary file 1 [file e32af973aa9784177c03cd7d.xlsx]

## Sheet: Table S1
Table S1 Instrumental variables used in MR analysis.
Exposure	Outcome	SNP	Effect allele	Other allele	Exposure			Outcome
					Beta	SE	P-value	Beta	SE	P-value
Retinol	gestational hypertension	rs117219913	C	T	0.0476864	0.0103813	4.39997e-06	-0.0210467	0.0288821	0.466178
Retinol	gestational hypertension	rs117669768	A	G	0.0789545	0.0147682	8.99995e-08	-0.0188131	0.0256276	0.462891
Retinol	gestational hypertension	rs12119164	G	A	0.0295741	0.00637063	3.40001e-06	-0.0165488	0.0214535	0.44048
Retinol	gestational hypertension	rs149577802	T	C	-0.108795	0.0234115	3.40001e-06	-0.0446306	0.0768753	0.561538
Retinol	gestational hypertension	rs2126371	T	C	-0.0289453	0.00597696	1.29999e-06	0.0247639	0.0170805	0.147104
Retinol	gestational hypertension	rs3213829	G	T	0.025976	0.00560984	3.59998e-06	0.0123495	0.0150145	0.410788
Retinol	gestational hypertension	rs692790	C	T	0.0404149	0.00838208	1.40001e-06	-0.0404686	0.020706	0.0506501
Retinol	gestational hypertension	rs74977546	A	G	-0.063514	0.0126784	5.49997e-07	-0.000455176	0.0394471	0.990793
Retinol	gestational hypertension	rs909570	A	G	-0.053135	0.0115717	4.39997e-06	-0.0315338	0.0362605	0.384493
Carotene	gestational hypertension	rs116995905	T	C	-0.132301	0.0288061	4.39997e-06	0.336326	0.176917	0.0572968
Carotene	gestational hypertension	rs117731008	A	G	0.0977133	0.0212277	4.20001e-06	0.0702919	0.0393283	0.0738873
Carotene	gestational hypertension	rs12126792	G	A	-0.134712	0.0280049	1.5e-06	-0.0523867	0.0878288	0.550865
Carotene	gestational hypertension	rs13295574	A	G	-0.0276722	0.00598182	3.69999e-06	0.012046	0.0155513	0.438577
Carotene	gestational hypertension	rs16898247	A	G	-0.107091	0.0200309	8.99995e-08	0.0125341	0.0737318	0.865013
Carotene	gestational hypertension	rs17800766	C	T	-0.121685	0.0254964	1.79999e-06	0.00876429	0.108633	0.935698
Carotene	gestational hypertension	rs1936052	T	C	-0.0361185	0.00766833	2.5e-06	-0.0159513	0.0223072	0.474564
Carotene	gestational hypertension	rs2998143	G	A	-0.0278722	0.00584016	1.79999e-06	0.0140144	0.0160064	0.381276
Carotene	gestational hypertension	rs366337	G	A	0.0543804	0.0112221	1.29999e-06	-0.0327128	0.037686	0.385375
Carotene	gestational hypertension	rs3829931	A	T	0.0830829	0.0177899	2.99999e-06	0.0119741	0.034235	0.726517
Carotene	gestational hypertension	rs4771831	A	G	-0.0265212	0.00576207	4.20001e-06	-0.0117296	0.0170436	0.491319
Carotene	gestational hypertension	rs5760695	C	T	0.0468481	0.0100556	3.2e-06	-0.00717145	0.0193799	0.711348
Carotene	gestational hypertension	rs62417408	G	A	-0.0691153	0.0146553	2.39999e-06	0.0054464	0.0310296	0.860669
Carotene	gestational hypertension	rs6596473	C	G	0.0276423	0.00597629	3.69999e-06	-0.00789165	0.0160834	0.623659
Carotene	gestational hypertension	rs6660246	C	A	-0.0266889	0.00553072	1.40001e-06	-0.0239774	0.0150748	0.111709
Carotene	gestational hypertension	rs77547747	C	T	-0.055803	0.0118339	2.39999e-06	0.0543419	0.0442164	0.219073
Vitamin C	gestational hypertension	rs114598078	T	C	0.0655782	0.0137636	1.89998e-06	0.0050315	0.0403776	0.900831
Vitamin C	gestational hypertension	rs11650824	A	T	0.0794787	0.0158822	5.60003e-07	0.00494043	0.0284374	0.862077
Vitamin C	gestational hypertension	rs17482258	T	C	0.042829	0.00926045	3.69999e-06	0.0329256	0.0236008	0.162984
Vitamin C	gestational hypertension	rs1883993	A	G	0.044959	0.00935324	1.5e-06	-0.00658311	0.0181647	0.717044
Vitamin C	gestational hypertension	rs2018201	G	T	-0.0808079	0.0171646	2.5e-06	0.0438523	0.0619876	0.479295
Vitamin C	gestational hypertension	rs4238567	C	T	0.0253068	0.00550812	4.30002e-06	0.0202933	0.0150944	0.178809
Vitamin C	gestational hypertension	rs4481190	C	A	-0.0306375	0.00574377	9.59997e-08	0.0114981	0.0155542	0.459766
Vitamin C	gestational hypertension	rs61868302	T	C	-0.0571013	0.0118391	1.40001e-06	0.0597458	0.04015	0.136733
Vitamin C	gestational hypertension	rs74978963	T	C	0.150814	0.0310213	1.2e-06	-0.079487	0.0464338	0.0869281
Vitamin C	gestational hypertension	rs7626478	A	G	0.0279796	0.00610134	4.49997e-06	-0.0289247	0.0172878	0.0943018
Vitamin C	gestational hypertension	rs9540734	A	G	-0.0259285	0.00548469	2.30001e-06	0.0225793	0.0149717	0.131521
Vitamin E	gestational hypertension	rs111306778	A	G	-0.0479658	0.00957227	5.39995e-07	0.00301408	0.0244005	0.901692
Vitamin E	gestational hypertension	rs12165526	A	T	0.0479017	0.00917775	1.79999e-07	0.0135657	0.0247765	0.584022
Vitamin E	gestational hypertension	rs12421920	G	A	-0.0434479	0.00938496	3.69999e-06	0.0208406	0.0346521	0.547558
Vitamin E	gestational hypertension	rs12899673	A	G	0.0268951	0.00581803	3.79997e-06	-0.00437407	0.0155592	0.778615
Vitamin E	gestational hypertension	rs2723979	G	T	-0.0266142	0.00552745	1.5e-06	0.0242553	0.0150623	0.107326
Vitamin E	gestational hypertension	rs35218694	G	A	-0.0741637	0.0153104	1.29999e-06	-0.116621	0.0530932	0.028053
Vitamin E	gestational hypertension	rs4903544	T	C	-0.0295098	0.0060211	9.49992e-07	0.0141855	0.0158796	0.371688
Vitamin E	gestational hypertension	rs536912	A	C	0.0304596	0.00620091	8.99995e-07	-0.00853421	0.0172189	0.620156
Vitamin E	gestational hypertension	rs6033	G	A	-0.0516563	0.0105563	9.90011e-07	-0.0233316	0.0235838	0.322512
Vitamin E	gestational hypertension	rs71385328	G	A	0.130015	0.0262064	7.00003e-07	0.0659426	0.0316589	0.0372589
Vitamin E	gestational hypertension	rs79966958	T	C	-0.116527	0.024505	2e-06	0.0153886	0.0554041	0.781203
Vitamin E	gestational hypertension	rs979218	C	A	-0.0430325	0.00922259	3.09999e-06	-0.00627942	0.0203597	0.757761
GST	gestational hypertension	rs117829315	G	T	-0.616	0.1274	1.32e-06	-0.0389937	0.0424172	0.357943
GST	gestational hypertension	rs12214820	A	G	0.1825	0.0342	9.77e-08	-0.00784922	0.0201913	0.697466
GST	gestational hypertension	rs140020114	A	G	-0.4294	0.0943	5.37e-06	0.00544674	0.110139	0.960558
GST	gestational hypertension	rs2185401	T	C	-0.35	0.071	8.13e-07	-0.00756538	0.0653431	0.907827
GST	gestational hypertension	rs2290758	A	G	0.4157	0.0237	7.24e-69	-0.0148086	0.0150369	0.324714
GST	gestational hypertension	rs60042638	A	G	0.2116	0.0449	2.4e-06	-0.0239164	0.0215255	0.266537
GST	gestational hypertension	rs7238437	G	A	0.1471	0.0323	5.25e-06	0.00763905	0.0200508	0.703215
GST	gestational hypertension	rs73073444	T	C	-0.5614	0.1193	2.51e-06	-0.0729053	0.0394557	0.0646353
GST	gestational hypertension	rs75534686	T	C	0.4056	0.0869	3.02e-06	-0.0598623	0.053035	0.259011
GST	gestational hypertension	rs7720426	A	G	-0.15	0.0324	3.63e-06	0.0134787	0.0183514	0.462657
GST	gestational hypertension	rs7819300	T	C	-0.122	0.0258	2.19e-06	-0.00857368	0.0154967	0.580087
GST	gestational hypertension	rs78409028	A	G	0.7853	0.1614	1.15e-06	-0.0186832	0.0999325	0.851694
GST	gestational hypertension	rs79104405	A	G	0.4456	0.0816	4.68e-08	0.0438352	0.0376112	0.243824
CAT	gestational hypertension	rs10918963	C	T	-0.1459	0.031	2.45e-06	0.00104351	0.0167093	0.950204
CAT	gestational hypertension	rs116670019	T	C	-0.4967	0.1071	3.55e-06	0.100192	0.238665	0.674629
CAT	gestational hypertension	rs116970161	T	G	0.4723	0.097	1.12e-06	0.0402221	0.0454728	0.37641
CAT	gestational hypertension	rs117850844	T	C	0.3846	0.0844	5.25e-06	-0.0107036	0.0524997	0.838448
CAT	gestational hypertension	rs12205369	T	C	-0.4638	0.1041	8.32e-06	-0.0132659	0.193319	0.945291
CAT	gestational hypertension	rs12346810	G	A	0.2117	0.0479	9.77e-06	0.0244159	0.0275294	0.375133
CAT	gestational hypertension	rs13381678	T	C	0.1712	0.0366	2.88e-06	0.0118011	0.0176432	0.503577
CAT	gestational hypertension	rs146027040	G	C	0.3764	0.0828	5.5e-06	-0.0379676	0.0396148	0.337852
CAT	gestational hypertension	rs1549981	A	G	-0.1137	0.0255	8.51e-06	0.0213343	0.0152806	0.162663
CAT	gestational hypertension	rs1685815	A	G	-0.1454	0.0296	9.12e-07	0.00514398	0.0179529	0.774474
CAT	gestational hypertension	rs17089624	C	T	-0.2808	0.0559	5.01e-07	0.020282	0.0274003	0.459172
CAT	gestational hypertension	rs2745924	T	G	0.1894	0.0249	2.69e-14	0.0261538	0.0150248	0.0817354
CAT	gestational hypertension	rs28549749	C	T	0.1215	0.0261	3.31e-06	-0.000987651	0.0151726	0.948099
CAT	gestational hypertension	rs4008479	G	T	-0.1406	0.0313	6.92e-06	-0.00602687	0.0172208	0.726357
CAT	gestational hypertension	rs4592441	T	C	-0.1176	0.0263	7.76e-06	0.000772982	0.0154995	0.960225
CAT	gestational hypertension	rs4806509	T	G	0.1429	0.0288	6.76e-07	-0.0137884	0.0169917	0.41709
CAT	gestational hypertension	rs4970968	T	G	0.1208	0.0258	2.88e-06	0.0157755	0.0156312	0.312864
CAT	gestational hypertension	rs56106813	T	C	-0.257	0.0511	5.01e-07	-0.0590032	0.0346091	0.0882226
CAT	gestational hypertension	rs5762307	C	T	0.2742	0.0617	8.71e-06	-0.0181714	0.0333748	0.586122
CAT	gestational hypertension	rs700715	C	T	-0.1358	0.0262	2.24e-07	0.00696712	0.0157868	0.658977
CAT	gestational hypertension	rs72819270	T	C	0.306	0.0691	9.55e-06	-0.0575432	0.0558748	0.303076
CAT	gestational hypertension	rs73087640	T	C	0.1948	0.0414	2.57e-06	0.0209685	0.0290236	0.470009
CAT	gestational hypertension	rs7704787	T	C	-0.129	0.029	8.71e-06	0.00399107	0.0181191	0.825662
CAT	gestational hypertension	rs78515545	T	C	0.1587	0.0352	6.61e-06	-0.00136383	0.0218421	0.950212
CAT	gestational hypertension	rs79696893	G	A	0.3234	0.0707	4.79e-06	-0.041197	0.0355544	0.246576
CAT	gestational hypertension	rs9611237	A	G	-0.2402	0.0542	9.33e-06	0.0650159	0.0392356	0.0975057
SOD	gestational hypertension	rs10745788	T	A	-0.3101	0.0677	4.57e-06	-0.0162648	0.0297906	0.585086
SOD	gestational hypertension	rs1114691	T	A	0.1136	0.0248	4.57e-06	-0.0128679	0.0150085	0.391236
SOD	gestational hypertension	rs111559123	A	C	0.3695	0.0824	7.41e-06	-0.0367138	0.0515954	0.476731
SOD	gestational hypertension	rs113089419	C	A	0.3207	0.0664	1.35e-06	0.0340691	0.0568627	0.549074
SOD	gestational hypertension	rs116530051	A	C	0.4002	0.0856	2.95e-06	-0.0488143	0.0393598	0.214898
SOD	gestational hypertension	rs11861986	T	G	-0.1359	0.0297	4.9e-06	0.00950451	0.0188191	0.613527
SOD	gestational hypertension	rs12937481	C	T	-0.1204	0.0265	5.37e-06	0.035598	0.0153345	0.0202633
SOD	gestational hypertension	rs1317414	G	A	-0.11	0.0246	7.94e-06	0.0289344	0.0149648	0.0531753
SOD	gestational hypertension	rs148622725	T	C	0.7258	0.1526	1.95e-06	0.0805114	0.0713553	0.259186
SOD	gestational hypertension	rs1499701	A	C	0.1141	0.0251	5.5e-06	-0.00584547	0.0152356	0.701221
SOD	gestational hypertension	rs1996441	A	C	-0.1457	0.0327	8.32e-06	-0.0100434	0.0177542	0.571605
SOD	gestational hypertension	rs2016081	C	T	-0.4437	0.0934	2.04e-06	0.00358669	0.0587478	0.951318
SOD	gestational hypertension	rs2695234	G	A	-0.3427	0.0459	8.32e-14	0.0375345	0.0271654	0.167063
SOD	gestational hypertension	rs36134863	G	A	-0.1685	0.0379	8.51e-06	0.0203714	0.0290407	0.483005
SOD	gestational hypertension	rs3790028	C	G	-0.1721	0.0371	3.47e-06	0.0603011	0.0215185	0.00507411
SOD	gestational hypertension	rs3805535	C	T	-0.155	0.0345	7.08e-06	-0.00532402	0.021853	0.807518
SOD	gestational hypertension	rs4619877	A	G	-0.1522	0.0284	7.94e-08	-0.0118419	0.0160993	0.462001
SOD	gestational hypertension	rs4803050	A	T	0.1501	0.0305	8.32e-07	-0.00941989	0.0180165	0.601081
SOD	gestational hypertension	rs4856490	C	T	-0.1558	0.0319	1.02e-06	0.0216586	0.0193897	0.263986
SOD	gestational hypertension	rs6597405	A	G	-0.2414	0.0541	8.13e-06	0.0487047	0.0458519	0.288136
SOD	gestational hypertension	rs73164157	C	A	0.4627	0.0951	1.15e-06	0.00483054	0.0992456	0.96118
SOD	gestational hypertension	rs7523327	A	G	-0.1164	0.0249	2.82e-06	0.00882508	0.0149212	0.554222
SOD	gestational hypertension	rs9805102	A	G	-0.2928	0.0647	6.03e-06	-0.0212564	0.0374341	0.570147
GPX	gestational hypertension	rs1097234	A	C	0.5633	0.0311	1.62e-73	0.0117269	0.020885	0.574455
GPX	gestational hypertension	rs116766476	T	G	0.5526	0.1207	4.79e-06	0.146601	0.17818	0.410639
GPX	gestational hypertension	rs12936913	T	C	-0.127	0.0272	3.09e-06	0.0277606	0.0179546	0.122068
GPX	gestational hypertension	rs139151548	A	G	0.5427	0.1199	6.03e-06	0.0846898	0.113766	0.456623
GPX	gestational hypertension	rs144367755	A	G	-0.1727	0.0384	7.08e-06	0.0227875	0.0222403	0.30555
GPX	gestational hypertension	rs204523	T	A	-0.15	0.0315	1.95e-06	0.0259005	0.0191207	0.175552
GPX	gestational hypertension	rs2566479	G	A	-0.2131	0.0478	8.51e-06	-0.0217772	0.0290399	0.453311
GPX	gestational hypertension	rs59212942	T	C	-0.2322	0.0518	7.41e-06	-0.021723	0.0432281	0.615303
GPX	gestational hypertension	rs61797068	C	G	0.1589	0.0343	3.63e-06	0.0283007	0.0206373	0.170272
GPX	gestational hypertension	rs61821092	G	T	-0.2171	0.0407	9.55e-08	0.0100065	0.0243187	0.680724
GPX	gestational hypertension	rs6892733	A	G	0.1133	0.0246	3.98e-06	0.000950032	0.0152193	0.950226
GPX	gestational hypertension	rs6902202	C	T	-0.124	0.028	9.77e-06	-0.00221979	0.0183869	0.903908
GPX	gestational hypertension	rs6993770	T	A	-0.134	0.0274	1.05e-06	-0.0157175	0.0180817	0.38471
GPX	gestational hypertension	rs7186574	T	C	0.1706	0.0355	1.51e-06	0.00903871	0.0189453	0.633295
GPX	gestational hypertension	rs73135263	G	C	-0.4228	0.0918	4.17e-06	-0.0744554	0.0591589	0.208187
GPX	gestational hypertension	rs74401788	T	G	0.3574	0.0785	5.25e-06	-0.0299067	0.0328253	0.36225
GPX	gestational hypertension	rs76331340	A	G	-0.3168	0.0601	1.38e-07	-0.190135	0.0690565	0.00589929
GPX	gestational hypertension	rs76810214	A	G	-0.3053	0.0682	7.41e-06	0.0969901	0.081806	0.235776
GPX	gestational hypertension	rs77041245	A	G	-0.579	0.1227	2.34e-06	-0.0313636	0.0609944	0.607109
GPX	gestational hypertension	rs9883667	A	G	-0.284	0.0618	4.37e-06	0.0105969	0.0356606	0.766344
Retinol	preeclampsia	rs117219913	C	T	0.0476864	0.0103813	4.39997e-06	0.0245697	0.0325456	0.450289
Retinol	preeclampsia	rs117669768	A	G	0.0789545	0.0147682	8.99995e-08	0.0070512	0.0288608	0.806985
Retinol	preeclampsia	rs12119164	G	A	0.0295741	0.00637063	3.40001e-06	0.0164683	0.0241777	0.495786
Retinol	preeclampsia	rs149577802	T	C	-0.108795	0.0234115	3.40001e-06	-0.219112	0.0868258	0.0116166
Retinol	preeclampsia	rs2126371	T	C	-0.0289453	0.00597696	1.29999e-06	0.0169629	0.0192728	0.378779
Retinol	preeclampsia	rs3213829	G	T	0.025976	0.00560984	3.59998e-06	-0.00428358	0.0169621	0.800625
Retinol	preeclampsia	rs692790	C	T	0.0404149	0.00838208	1.40001e-06	-0.0140162	0.023458	0.550173
Retinol	preeclampsia	rs74977546	A	G	-0.063514	0.0126784	5.49997e-07	0.0191644	0.0446676	0.66789
Retinol	preeclampsia	rs909570	A	G	-0.053135	0.0115717	4.39997e-06	-0.0274327	0.0413564	0.507124
Carotene	preeclampsia	rs116995905	T	C	-0.132301	0.0288061	4.39997e-06	0.280596	0.194891	0.149936
Carotene	preeclampsia	rs117731008	A	G	0.0977133	0.0212277	4.20001e-06	0.0714388	0.044855	0.111236
Carotene	preeclampsia	rs12126792	G	A	-0.134712	0.0280049	1.5e-06	-0.0935362	0.0977575	0.338659
Carotene	preeclampsia	rs13295574	A	G	-0.0276722	0.00598182	3.69999e-06	0.00946579	0.0175722	0.590107
Carotene	preeclampsia	rs16898247	A	G	-0.107091	0.0200309	8.99995e-08	0.0218145	0.082611	0.791732
Carotene	preeclampsia	rs17800766	C	T	-0.121685	0.0254964	1.79999e-06	0.193946	0.12326	0.11561
Carotene	preeclampsia	rs1936052	T	C	-0.0361185	0.00766833	2.5e-06	-0.0536162	0.0251117	0.0327522
Carotene	preeclampsia	rs2998143	G	A	-0.0278722	0.00584016	1.79999e-06	-0.0220411	0.0180657	0.222446
Carotene	preeclampsia	rs366337	G	A	0.0543804	0.0112221	1.29999e-06	0.0205655	0.0425657	0.62899
Carotene	preeclampsia	rs3829931	A	T	0.0830829	0.0177899	2.99999e-06	-0.0236793	0.0389233	0.54295
Carotene	preeclampsia	rs4771831	A	G	-0.0265212	0.00576207	4.20001e-06	-0.005241	0.0192795	0.785742
Carotene	preeclampsia	rs5760695	C	T	0.0468481	0.0100556	3.2e-06	-0.0070212	0.0219331	0.748878
Carotene	preeclampsia	rs62417408	G	A	-0.0691153	0.0146553	2.39999e-06	0.0692077	0.035129	0.048827
Carotene	preeclampsia	rs6596473	C	G	0.0276423	0.00597629	3.69999e-06	-0.0455235	0.0182036	0.0123914
Carotene	preeclampsia	rs6660246	C	A	-0.0266889	0.00553072	1.40001e-06	-0.0172895	0.0170269	0.309904
Carotene	preeclampsia	rs77547747	C	T	-0.055803	0.0118339	2.39999e-06	-0.0344764	0.0499703	0.490234
Vitamin C	preeclampsia	rs114598078	T	C	0.0655782	0.0137636	1.89998e-06	0.0302071	0.0457712	0.50928
Vitamin C	preeclampsia	rs11650824	A	T	0.0794787	0.0158822	5.60003e-07	-0.026185	0.0322638	0.417027
Vitamin C	preeclampsia	rs17482258	T	C	0.042829	0.00926045	3.69999e-06	0.0767509	0.0262463	0.00345279
Vitamin C	preeclampsia	rs1883993	A	G	0.044959	0.00935324	1.5e-06	0.00125916	0.0205502	0.951142
Vitamin C	preeclampsia	rs2018201	G	T	-0.0808079	0.0171646	2.5e-06	0.009802	0.0694414	0.887748
Vitamin C	preeclampsia	rs4238567	C	T	0.0253068	0.00550812	4.30002e-06	0.00317832	0.0170429	0.852061
Vitamin C	preeclampsia	rs4481190	C	A	-0.0306375	0.00574377	9.59997e-08	0.021037	0.0175419	0.230433
Vitamin C	preeclampsia	rs61868302	T	C	-0.0571013	0.0118391	1.40001e-06	0.042421	0.0450081	0.345927
Vitamin C	preeclampsia	rs74978963	T	C	0.150814	0.0310213	1.2e-06	0.0678129	0.0524531	0.19607
Vitamin C	preeclampsia	rs7626478	A	G	0.0279796	0.00610134	4.49997e-06	0.0146634	0.0194971	0.452002
Vitamin C	preeclampsia	rs9540734	A	G	-0.0259285	0.00548469	2.30001e-06	0.0240404	0.0169057	0.155019
Vitamin E	preeclampsia	rs111306778	A	G	-0.0479658	0.00957227	5.39995e-07	-0.00738423	0.0276404	0.789351
Vitamin E	preeclampsia	rs12165526	A	T	0.0479017	0.00917775	1.79999e-07	-0.0313801	0.0280782	0.26374
Vitamin E	preeclampsia	rs12421920	G	A	-0.0434479	0.00938496	3.69999e-06	0.0545926	0.0388505	0.159962
Vitamin E	preeclampsia	rs12899673	A	G	0.0268951	0.00581803	3.79997e-06	-0.0223821	0.0175744	0.202819
Vitamin E	preeclampsia	rs2723979	G	T	-0.0266142	0.00552745	1.5e-06	-0.0208793	0.017012	0.219701
Vitamin E	preeclampsia	rs35218694	G	A	-0.0741637	0.0153104	1.29999e-06	0.0486631	0.0593749	0.41245
Vitamin E	preeclampsia	rs4903544	T	C	-0.0295098	0.0060211	9.49992e-07	0.00240609	0.0179537	0.893389
Vitamin E	preeclampsia	rs536912	A	C	0.0304596	0.00620091	8.99995e-07	-0.0442286	0.0193817	0.0224911
Vitamin E	preeclampsia	rs6033	G	A	-0.0516563	0.0105563	9.90011e-07	-0.0884535	0.0272067	0.00114932
Vitamin E	preeclampsia	rs71385328	G	A	0.130015	0.0262064	7.00003e-07	0.0408997	0.0360836	0.257016
Vitamin E	preeclampsia	rs79966958	T	C	-0.116527	0.024505	2e-06	-0.105421	0.062792	0.093173
Vitamin E	preeclampsia	rs979218	C	A	-0.0430325	0.00922259	3.09999e-06	-0.0112026	0.0230052	0.626286
GST	preeclampsia	rs117829315	G	T	-0.616	0.1274	1.32e-06	0.0392555	0.0479011	0.412494
GST	preeclampsia	rs12214820	A	G	0.1825	0.0342	9.77e-08	-0.0264116	0.022742	0.245495
GST	preeclampsia	rs140020114	A	G	-0.4294	0.0943	5.37e-06	-0.0974984	0.122247	0.425128
GST	preeclampsia	rs2185401	T	C	-0.35	0.071	8.13e-07	0.0352393	0.0744755	0.636095
GST	preeclampsia	rs2290758	A	G	0.4157	0.0237	7.24e-69	0.0328048	0.0169876	0.05347
GST	preeclampsia	rs60042638	A	G	0.2116	0.0449	2.4e-06	0.0038571	0.0244436	0.874618
GST	preeclampsia	rs7238437	G	A	0.1471	0.0323	5.25e-06	0.0156379	0.0225951	0.488879
GST	preeclampsia	rs73073444	T	C	-0.5614	0.1193	2.51e-06	0.0513572	0.0444262	0.247676
GST	preeclampsia	rs75534686	T	C	0.4056	0.0869	3.02e-06	-0.124782	0.0596931	0.0365822
GST	preeclampsia	rs7720426	A	G	-0.15	0.0324	3.63e-06	0.00337246	0.0207834	0.871096
GST	preeclampsia	rs7819300	T	C	-0.122	0.0258	2.19e-06	-0.00499301	0.0175153	0.775593
GST	preeclampsia	rs78409028	A	G	0.7853	0.1614	1.15e-06	0.0154848	0.114541	0.892462
GST	preeclampsia	rs79104405	A	G	0.4456	0.0816	4.68e-08	-0.0521378	0.0424592	0.219465
CAT	preeclampsia	rs10918963	C	T	-0.1459	0.031	2.45e-06	0.0180351	0.0189147	0.340337
CAT	preeclampsia	rs116670019	T	C	-0.4967	0.1071	3.55e-06	0.340023	0.267229	0.20323
CAT	preeclampsia	rs116970161	T	G	0.4723	0.097	1.12e-06	0.0393668	0.0519902	0.448932
CAT	preeclampsia	rs117850844	T	C	0.3846	0.0844	5.25e-06	-0.00256325	0.0592628	0.9655
CAT	preeclampsia	rs12205369	T	C	-0.4638	0.1041	8.32e-06	0.164503	0.215895	0.446083
CAT	preeclampsia	rs12346810	G	A	0.2117	0.0479	9.77e-06	-0.0325924	0.0312079	0.296317
CAT	preeclampsia	rs13381678	T	C	0.1712	0.0366	2.88e-06	-0.0275685	0.0199864	0.167784
CAT	preeclampsia	rs146027040	G	C	0.3764	0.0828	5.5e-06	0.0231164	0.0442792	0.601628
CAT	preeclampsia	rs1549981	A	G	-0.1137	0.0255	8.51e-06	0.00493265	0.0172424	0.77482
CAT	preeclampsia	rs1685815	A	G	-0.1454	0.0296	9.12e-07	-0.00270735	0.0202336	0.893557
CAT	preeclampsia	rs17089624	C	T	-0.2808	0.0559	5.01e-07	0.00933201	0.0309979	0.763375
CAT	preeclampsia	rs2745924	T	G	0.1894	0.0249	2.69e-14	0.00824803	0.0169792	0.627129
CAT	preeclampsia	rs28549749	C	T	0.1215	0.0261	3.31e-06	-0.00893608	0.0171459	0.602242
CAT	preeclampsia	rs4008479	G	T	-0.1406	0.0313	6.92e-06	-0.0277316	0.0195069	0.155133
CAT	preeclampsia	rs4592441	T	C	-0.1176	0.0263	7.76e-06	0.0239064	0.0175517	0.173181
CAT	preeclampsia	rs4806509	T	G	0.1429	0.0288	6.76e-07	-0.0228997	0.0191596	0.232007
CAT	preeclampsia	rs4970968	T	G	0.1208	0.0258	2.88e-06	-0.00889336	0.0176494	0.614339
CAT	preeclampsia	rs56106813	T	C	-0.257	0.0511	5.01e-07	-0.0730624	0.0391743	0.0621727
CAT	preeclampsia	rs5762307	C	T	0.2742	0.0617	8.71e-06	-0.0121588	0.037838	0.747954
CAT	preeclampsia	rs700715	C	T	-0.1358	0.0262	2.24e-07	0.0160428	0.017835	0.368379
CAT	preeclampsia	rs72819270	T	C	0.306	0.0691	9.55e-06	0.0195904	0.0627481	0.754884
CAT	preeclampsia	rs73087640	T	C	0.1948	0.0414	2.57e-06	-0.00637063	0.0328015	0.846006
CAT	preeclampsia	rs7704787	T	C	-0.129	0.029	8.71e-06	-0.017796	0.0204853	0.385
CAT	preeclampsia	rs78515545	T	C	0.1587	0.0352	6.61e-06	0.0140523	0.0246063	0.567942
CAT	preeclampsia	rs79696893	G	A	0.3234	0.0707	4.79e-06	0.0176837	0.0405464	0.66274
CAT	preeclampsia	rs9611237	A	G	-0.2402	0.0542	9.33e-06	0.0292205	0.044123	0.507811
SOD	preeclampsia	rs10745788	T	A	-0.3101	0.0677	4.57e-06	-0.067692	0.033633	0.0441499
SOD	preeclampsia	rs1114691	T	A	0.1136	0.0248	4.57e-06	0.00384837	0.0169341	0.820225
SOD	preeclampsia	rs111559123	A	C	0.3695	0.0824	7.41e-06	-0.148674	0.0584295	0.0109433
SOD	preeclampsia	rs113089419	C	A	0.3207	0.0664	1.35e-06	0.0648736	0.0632389	0.304962
SOD	preeclampsia	rs116530051	A	C	0.4002	0.0856	2.95e-06	-0.00517524	0.0442494	0.906895
SOD	preeclampsia	rs11861986	T	G	-0.1359	0.0297	4.9e-06	-0.00737685	0.0212253	0.728179
SOD	preeclampsia	rs12937481	C	T	-0.1204	0.0265	5.37e-06	-0.00242706	0.0173357	0.888657
SOD	preeclampsia	rs1317414	G	A	-0.11	0.0246	7.94e-06	-0.0176356	0.016899	0.296674
SOD	preeclampsia	rs148622725	T	C	0.7258	0.1526	1.95e-06	0.060637	0.0818615	0.458859
SOD	preeclampsia	rs1499701	A	C	0.1141	0.0251	5.5e-06	0.00625444	0.0172041	0.716198
SOD	preeclampsia	rs1996441	A	C	-0.1457	0.0327	8.32e-06	-0.0161988	0.0201473	0.421385
SOD	preeclampsia	rs2016081	C	T	-0.4437	0.0934	2.04e-06	-0.0455387	0.0667068	0.494815
SOD	preeclampsia	rs2695234	G	A	-0.3427	0.0459	8.32e-14	0.00786153	0.0305612	0.796994
SOD	preeclampsia	rs36134863	G	A	-0.1685	0.0379	8.51e-06	0.0119195	0.0328002	0.716307
SOD	preeclampsia	rs3790028	C	G	-0.1721	0.0371	3.47e-06	0.0159039	0.0246764	0.519251
SOD	preeclampsia	rs3805535	C	T	-0.155	0.0345	7.08e-06	0.0237553	0.0246808	0.335797
SOD	preeclampsia	rs4619877	A	G	-0.1522	0.0284	7.94e-08	0.0391745	0.0181449	0.0308518
SOD	preeclampsia	rs4803050	A	T	0.1501	0.0305	8.32e-07	-0.0179419	0.0203013	0.376816
SOD	preeclampsia	rs4856490	C	T	-0.1558	0.0319	1.02e-06	-0.0353366	0.0218559	0.105922
SOD	preeclampsia	rs6597405	A	G	-0.2414	0.0541	8.13e-06	0.12786	0.0498429	0.0103098
SOD	preeclampsia	rs73164157	C	A	0.4627	0.0951	1.15e-06	-0.0974792	0.110949	0.379621
SOD	preeclampsia	rs7523327	A	G	-0.1164	0.0249	2.82e-06	0.014062	0.0168804	0.404824
SOD	preeclampsia	rs9805102	A	G	-0.2928	0.0647	6.03e-06	-0.0561534	0.0423226	0.184577
GPX	preeclampsia	rs1097234	A	C	0.5633	0.0311	1.62e-73	0.0119997	0.0235452	0.610301
GPX	preeclampsia	rs116766476	T	G	0.5526	0.1207	4.79e-06	0.079062	0.195049	0.685225
GPX	preeclampsia	rs12936913	T	C	-0.127	0.0272	3.09e-06	-0.00728805	0.0202585	0.719032
GPX	preeclampsia	rs139151548	A	G	0.5427	0.1199	6.03e-06	0.0552061	0.125989	0.661255
GPX	preeclampsia	rs144367755	A	G	-0.1727	0.0384	7.08e-06	0.0558502	0.0252097	0.0267313
GPX	preeclampsia	rs204523	T	A	-0.15	0.0315	1.95e-06	-0.0155587	0.0216471	0.4723
GPX	preeclampsia	rs2566479	G	A	-0.2131	0.0478	8.51e-06	0.00862703	0.0328829	0.793047
GPX	preeclampsia	rs59212942	T	C	-0.2322	0.0518	7.41e-06	0.0557432	0.0488194	0.253527
GPX	preeclampsia	rs61797068	C	G	0.1589	0.0343	3.63e-06	-0.00106409	0.0233403	0.963637
GPX	preeclampsia	rs61821092	G	T	-0.2171	0.0407	9.55e-08	0.0394607	0.027385	0.149596
GPX	preeclampsia	rs6892733	A	G	0.1133	0.0246	3.98e-06	0.0293493	0.0171969	0.087884
GPX	preeclampsia	rs6902202	C	T	-0.124	0.028	9.77e-06	-0.00999901	0.0208638	0.63176
GPX	preeclampsia	rs6993770	T	A	-0.134	0.0274	1.05e-06	-0.00369092	0.0204115	0.856504
GPX	preeclampsia	rs7186574	T	C	0.1706	0.0355	1.51e-06	0.00562732	0.021449	0.793045
GPX	preeclampsia	rs73135263	G	C	-0.4228	0.0918	4.17e-06	-0.0742568	0.0673103	0.26994
GPX	preeclampsia	rs74401788	T	G	0.3574	0.0785	5.25e-06	-0.0618012	0.037376	0.0982291
GPX	preeclampsia	rs76331340	A	G	-0.3168	0.0601	1.38e-07	-0.146145	0.0743192	0.049247
GPX	preeclampsia	rs76810214	A	G	-0.3053	0.0682	7.41e-06	-0.00016808	0.0909609	0.998526
GPX	preeclampsia	rs77041245	A	G	-0.579	0.1227	2.34e-06	0.0151258	0.0690144	0.826518
GPX	preeclampsia	rs9883667	A	G	-0.284	0.0618	4.37e-06	-0.0305733	0.0403456	0.44858

## Sheet: Table S2
Table S2 The heterogeneity of instrumental variables.
Exposure	Outcome	Method	Cochran's Q	df	P-value
Retinol	gestational hypertension	MR Egger	7.35403	7	0.392972
Retinol	gestational hypertension	Inverse variance weighted	7.62953	8	0.470468
Retinol	preeclampsia	MR Egger	7.19253	7	0.409113
Retinol	preeclampsia	Inverse variance weighted	8.83379	8	0.356511
Carotene	gestational hypertension	MR Egger	14.7628	14	0.394556
Carotene	gestational hypertension	Inverse variance weighted	14.8212	15	0.464372
Carotene	preeclampsia	MR Egger	26.6986	14	0.0210652
Carotene	preeclampsia	Inverse variance weighted	26.8282	15	0.0301681
Vitamin C	gestational hypertension	MR Egger	12.604	9	0.181359
Vitamin C	gestational hypertension	Inverse variance weighted	12.6863	10	0.241745
Vitamin C	preeclampsia	MR Egger	15.133	9	0.0873458
Vitamin C	preeclampsia	Inverse variance weighted	15.9929	10	0.0998367
Vitamin E	gestational hypertension	MR Egger	6.85599	10	0.738967
Vitamin E	gestational hypertension	Inverse variance weighted	13.5149	11	0.261004
Vitamin E	preeclampsia	MR Egger	22.839	10	0.0113568
Vitamin E	preeclampsia	Inverse variance weighted	26.258	11	0.00593981
GST	gestational hypertension	MR Egger	9.74976	11	0.553027
GST	gestational hypertension	Inverse variance weighted	10.283	12	0.591152
GST	preeclampsia	MR Egger	14.3286	11	0.215342
GST	preeclampsia	Inverse variance weighted	14.4273	12	0.274255
CAT	gestational hypertension	MR Egger	18.7254	23	0.717044
CAT	gestational hypertension	Inverse variance weighted	18.7625	24	0.764534
CAT	preeclampsia	MR Egger	17.4211	23	0.788087
CAT	preeclampsia	Inverse variance weighted	18.6942	24	0.768093
SOD	gestational hypertension	MR Egger	14.2565	17	0.648869
SOD	gestational hypertension	Inverse variance weighted	16.0854	18	0.586586
SOD	preeclampsia	MR Egger	28.5461	17	0.0389482
SOD	preeclampsia	Inverse variance weighted	28.6009	18	0.0534796
GPX	gestational hypertension	MR Egger	15.2687	14	0.360039
GPX	gestational hypertension	Inverse variance weighted	16.2708	15	0.364286
GPX	preeclampsia	MR Egger	19.4611	14	0.148067
GPX	preeclampsia	Inverse variance weighted	19.5237	15	0.190977

## Sheet: Table S3
Table S3 Directional horizontal pleiotropy assessed by intercept term in MR Egger regression.
Exposure	Outcome	Egger_intercept	SE	P-value
Retinol	gestational hypertension	-0.00987241	0.0192785	0.624341
Retinol	preeclampsia	-0.027191	0.0215143	0.246742
Carotene	gestational hypertension	-0.00307391	0.0130667	0.817423
Carotene	preeclampsia	0.00517485	0.0198538	0.798159
Vitamin C	gestational hypertension	0.00372611	0.0153715	0.813901
Vitamin C	preeclampsia	-0.0136002	0.0190187	0.492681
Vitamin E	gestational hypertension	-0.0326211	0.0126414	0.027393
Vitamin E	preeclampsia	-0.0264827	0.0216446	0.249179
GST	gestational hypertension	-0.00994519	0.0136197	0.480527
GST	preeclampsia	0.00483756	0.0175683	0.788145
CAT	gestational hypertension	-0.00238442	0.0123741	0.84889
CAT	preeclampsia	-0.0158194	0.0140204	0.27082
SOD	gestational hypertension	-0.0150997	0.0111654	0.193974
SOD	preeclampsia	0.00295961	0.0163727	0.85869
GPX	gestational hypertension	-0.0119958	0.0125142	0.354036
GPX	preeclampsia	0.00338612	0.0159639	0.835078

## Sheet: Table S4
Table S4 MR-PRESSO analysis.
Exposure	Outcome	P-value
Retinol	gestational hypertension	0.492
Retinol	preeclampsia	0.408
Carotene	gestational hypertension	0.478
Carotene	preeclampsia	0.026
Vitamin C	gestational hypertension	0.276
Vitamin C	preeclampsia	0.103
Vitamin E	gestational hypertension	0.257
Vitamin E	preeclampsia	0.008
GST	gestational hypertension	0.526
GST	preeclampsia	0.176
CAT	gestational hypertension	0.755
CAT	preeclampsia	0.777
SOD	gestational hypertension	0.598
SOD	preeclampsia	0.052
GPX	gestational hypertension	0.443
GPX	preeclampsia	0.24
